# Supplementary material
Source: publisher figshare collection journal article supplement (https://acs.figshare.com/ndownloader/files/3849385)
Supplement: Supplementary file 1 [file 3849385]

## Supporting Information

### Kinetics and Mechanistic Insight into Efficient Fixation of CO<sub>2</sub> to Epoxides over *N*-heterocyclic Compound/ZnBr<sub>2</sub> Catalysts

Mengshuai Liu,<sup>‡</sup> Bo Liu,<sup>‡</sup> Shifa Zhong,<sup>‡</sup> Lei Shi,<sup>‡</sup> Lin Liang,<sup>§</sup> and Jianmin Sun<sup>\*,†,‡</sup>

<sup>†</sup>State Key Laboratory of Urban Water Resource and Environment, Harbin Institute of Technology, Harbin 150080, PR China

<sup>‡</sup>The Academy of Fundamental and Interdisciplinary Science, Harbin Institute of Technology, Harbin 150080, PR China

<sup>§</sup>School of Life Science and Technology, Harbin Institute of Technology, Harbin 150080, PR China

\*Corresponding authors: Jianmin Sun, E-mail: [sunjm@hit.edu.cn](mailto:sunjm@hit.edu.cn)

### The Formula Deduction Procedures of Reaction Rate for PC Formation<sup>1,2</sup>

The rate of PC formation was described as Eq. (S1)

$$\frac{d[P]}{dt} = k_2[CO_2][SIZ^{\xi}] \quad (S1)$$

Where,  $d[P]$  was PC concentration at a particular reaction time. The different rate expression describing the formation of  $SIZ^{\xi}$  was described as Eq. (S2)

$$\frac{d[SIZ^{\xi}]}{dt} = k_1[S][IZ] - k_{-1}[SIZ^{\xi}] - k_2[CO_2][SIZ^{\xi}] \quad (S2)$$

To simplify, assuming the reaction at pseudo-steady state, we obtained the following Eq. (S3) and Eq. (S4),

$$\frac{d[SIZ^{\xi}]}{dt} = k_1[S][IZ] - k_{-1}[SIZ^{\xi}] - k_2[CO_2][SIZ^{\xi}] = 0 \quad (S3)$$

$$[SIZ^{\xi}] = \frac{k_1[S][IZ]}{k_{-1} + k_2[CO_2]} \quad (S4)$$

Substituting  $[SIZ^{\xi}]$  into Eq. (S1) gave Eq. (S5).

$$\frac{d[P]}{dt} = \frac{k_1 k_2 [S][IZ][CO_2]}{k_{-1} + k_2[CO_2]} \quad (S5)$$

As the reaction carried out in a constant volume reactor, and  $CO_2$  was excessively used, the concentrations of  $CO_2$  and catalyst could be assumed constant, and Eq. (S5) could be shorten to the following Eq.:

$$\frac{d[P]}{dt} = -\frac{d[S]}{dt} = k[PO]$$

**Table S1. Kinetic Equations and Kinetic Parameters at Different Temperature**

| $T(^{\circ}C)$ | Kinetic equation         | $R'$   | $k \text{ (min}^{-1}\text{)}$ | $1/T \text{ (K}^{-1}\text{)}$ | $\ln k$ |
|----------------|--------------------------|--------|-------------------------------|-------------------------------|---------|
| 130            | $y = 0.02593x - 0.08567$ | 0.9883 | 0.02593                       | 0.00248                       | -3.652  |
| 140            | $y = 0.03798x - 0.24142$ | 0.9961 | 0.03798                       | 0.00242                       | -3.271  |
| 150            | $y = 0.04988x - 0.38295$ | 0.9969 | 0.04988                       | 0.00236                       | -2.998  |
| 160            | $y = 0.06073x - 0.39659$ | 0.9973 | 0.06073                       | 0.00231                       | -2.801  |

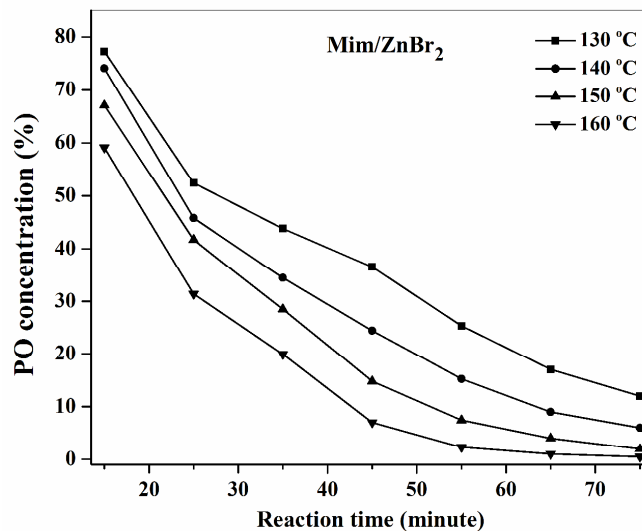

**Figure S1.** The remaining PO concentration-time profile at different temperatures over Mim/ZnBr<sub>2</sub> catalysts. Reaction conditions: PO 34.5 mmol, P (CO<sub>2</sub>) = 2.5 MPa, ZnBr<sub>2</sub> 0.09 mmol, Mim 0.36 mmol.

## References

- (1) Yu, J. I.; Choi, H. J.; Selvaraj, M.; Park, D. W. Catalytic performance of polymer-supported ionic liquids in the cycloaddition of carbon dioxide to allyl glycidyl ether. *Reac. Kinet. Mech. Cat.* **2011**, *102*, 353–365.
- (2) Chatelet, B.; Joucla, L.; Dutasta, J.; Martinez, A.; Szeto, K.; Dufaud, V. Azaphosphatranes as structurally tunable organocatalysts for carbonate synthesis from CO<sub>2</sub> and epoxides. *J. Am. Chem. Soc.*, **2013**, *135*, 5348–5351.
